# Supplementary material for: Determinations of ionosphere and plasmasphere electron content for an African chain of GPS stations
Source: Copernicus journal article supplement (doi:10.5194/angeo-35-599-2017), 2017-05-03
Supplement: Supplementary file 1 [file angeo-35-599-2017-supplement.zip]

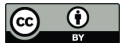

## *Supplement of*

# **Determinations of ionosphere and plasmasphere electron content for an African chain of GPS stations**

**Andrew J. Mazzella Jr. et al.**

*Correspondence to:* Andrew J. Mazzella Jr. (ajmazzella@brandeis.edu)

- angeo-35-599-2017-supplement-title-page.pdf
- Description.txt
- Fig02
  - IPPAlts.lst
- Fig03
  - ARMI1205.tbl
  - BDAR1205.tbl
  - FRSN1205.tbl
  - HNUS1205.tbl
  - KERG1205.tbl
  - MFKG1205.tbl
  - MOIU1205.tbl
  - NURK1205.tbl
  - SUTH1205.tbl
  - TDOU1205.tbl
  - TEZI1205.tbl
  - UKAM1205.tbl
- Fig04
  - ARMIBndN.tbl
  - ARMIBndS.tbl
  - BDARBndN.tbl
  - BDARBndS.tbl
  - FRSNBndS.tbl

- HNUSBndN.tbl
- MFKGBndN.tbl
- MFKGBndS.tbl
- MOIUBndN.tbl
- MOIUBndS.tbl
- NURKBndN.tbl
- NURKBndS.tbl
- SUTHBndN.tbl
- SUTHBndS.tbl
- TDOUBndN.tbl
- TDOUBndS.tbl
- TEZIBndN.tbl
- TEZIBndS.tbl
- UKAMBndN.tbl
- UKAMBndS.tbl

- Fig05

- MLT06
  - \* CODLat06.dat
  - \* CODLat06.err
  - \* ESALat06.dat
  - \* ESALat06.err
  - \* GPSLat06.dat
  - \* GPSLat06.err
  - \* JPLLat06.dat
  - \* JPLLat06.err
  - \* UPCLat06.dat
  - \* UPCLat06.err
- MLT12
  - \* CODLat12.dat
  - \* CODLat12.err
  - \* ESALat12.dat
  - \* ESALat12.err
  - \* GPSLat12.dat
  - \* GPSLat12.err
  - \* JPLLat12.dat
  - \* JPLLat12.err
  - \* UPCLat12.dat
  - \* UPCLat12.err
- MLT18
  - \* CODLat18.dat
  - \* CODLat18.err
  - \* ESALat18.dat
  - \* ESALat18.err
  - \* GPSLat18.dat

- \* GPSLat18.err
- \* JPLLat18.dat
- \* JPLLat18.err
- \* UPCLat18.dat
- \* UPCLat18.err
- MLT24
  - \* CODLat24.dat
  - \* CODLat24.err
  - \* ESALat24.dat
  - \* ESALat24.err
  - \* GPSLat24.dat
  - \* GPSLat24.err
  - \* JPLLat24.dat
  - \* JPLLat24.err
  - \* UPCLat24.dat
  - \* UPCLat24.err

- Fig06

- FRSNBTEC.tbl
- FRSNCEQV.tbl
- FRSNCVTC.tbl
- HNUSBTEC.tbl
- HNUSCEQV.tbl
- HNUSCVTC.tbl
- MOIUBTEC.tbl
- MOIUCEQV.tbl
- MOIUCVTC.tbl
- TEZIBTEC.tbl
- TEZICEQV.tbl
- TEZICVTC.tbl

- Fig07

- GI\_TEC.tbl
- GRHMIT.tbl
- OHIP1205.tbl

- Fig08

- ARMI.rel
- BDAR.rel
- CODE-CP.rel
- CODE-PP.rel
- FRSN.rel
- HNUS.rel
- MFKG.rel
- MOIU.rel

- NURK.rel
- SUTH.rel
- TDOU.rel
- TEZI.rel
- UKAM.rel

The copyright of individual parts of the supplement might differ from the CC-BY 3.0 licence.
